# Supplementary material for: Construct Validation of Self-Determination Theory in Second Language Scale: The Bifactor Exploratory Structural Equation Modeling Approach
Source: Frontiers journal article supplement (doi:10.3389/fpsyg.2021.732016), 2021-09-30
Supplement: Data_Sheet_1.pdf [file Data_Sheet_1.pdf]

## Appendix

### *Self-Determination Theory of Second Language Scale (SDT-L2) \**

Why are you learning English?

---

Item

---

#### ***Autonomous motivation***

##### **Intrinsic orientation**

Because I enjoy learning English

Because of the pleasure I get when hear and read English

For the satisfaction I feel when I speak and write in English

For the enjoyment I experience when I achieve a new goal in English learning

Because learning English is a fun activity in and of itself

##### **Identified orientation**

Because learning English is important for my personal growth

Because learning English can open new opportunities and possibilities for me

For the value it holds in my self-development

Because learning English is important for my current and future studies

Because learning English allows me to read and hear English-based materials that are necessary for my personal success

#### ***Controlled motivation***

##### **Introjected orientation**

Because I would feel guilty if I didn't understand English

Because I would feel ashamed if I'm not successful in English learning like my friend(s)/family

Because people around me (the teacher/peers/parents) expect me to learn English

Because people around me (the teacher/peers/parents) would think I'm a failure if I didn't speak English

Because I feel pressured by the people around me (the teacher/peers/parents) to learn English

##### **External orientation**

Because I want to get a prestigious job that requires English proficiency

Because I want to get better marks in the English course

Because English is just a required course that I want to pass

Because I don't want to fail the final exam in the English course

Because there will be negative consequences if I fail to learn English

---

\*(Alamer, 2021a,b)

## **Reference**

Alamer, A. (2021a). Basic psychological needs, motivational orientations, effort, and vocabulary knowledge: A comprehensive model. *Studies in Second Language Acquisition*. <https://doi.org/10.1017/S027226312100005X>.

Alamer, A. (2021b) Construct validation of self-determination theory in second language scale: The bifactor exploratory structural equation modeling approach. *Frontiers in Psychology*. <https://doi.org/10.3389/fpsyg.2021.732016>
